# Supplementary material for: The combination of apatinib and S-1 for the treatment of advanced gastric cancer in China: A meta-analysis of randomized controlled trials
Source: PubMed Central journal article supplement — Medicine (Baltimore). 2018 Nov 21;97(47):e13259. doi: 10.1097/MD.0000000000013259 (PMC6392758; doi:10.1097/md.0000000000013259), 2018-11-21
Supplement: medi-97-e13259-s001.pdf [file medi-97-e13259-s001.pdf]

**Supplementary Figure 1** Forest plot of the comparison of complete response rates (CR, A), partial response rates (PR, B) stable disease rates (SD, C) and progressive disease rates (PD, D) between the Apatinib+S-1 and S-1 groups. S-1: Gimeracil and Oteracil Porassium Capsules. The fixed-effects meta-analysis model (Mantel–Haenszel method) was used.

**Supplementary Figure 2.** Forest plot of the comparison of all-grade **hand-foot** syndrome between the Apatinib+S-1 and S-1 groups. S-1: Gimeracil and Oteracil Porassium Capsules. The fixed-effects meta-analysis model (Mantel–Haenszel method) was used.

**Supplementary Figure 3.** Forest plot of the comparison of all-grade hypertension between Apatinib+S-1 and S-1 groups. S-1: Gimeracil and Oteracil Porassium Capsules. The fixed-effects meta-analysis model (Mantel–Haenszel method) was used.

**Supplementary Figure 4.** Forest plot of the comparison of all-grade albuminuria between the Apatinib+S-1 and S-1 groups. S-1: Gimeracil and Oteracil Porassium Capsules. The fixed-effects meta-analysis model (Mantel–Haenszel method) was used.

**Supplementary Figure 5.** Forest plot of the comparison of all-grade hemoglobin reduction between the Apatinib+S-1 and S-1 groups. S-1: Gimeracil and Oteracil Porassium Capsules. The fixed-effects meta-analysis model (Mantel–Haenszel method) was used.

**Supplementary Figure 6.** Forest plot of the comparison of all-grade nausea and vomiting between the Apatinib+S-1 and S-1 groups. S-1: Gimeracil and Oteracil Porassium Capsules. The fixed-effects meta-analysis model (Mantel–Haenszel method) was used.

**Supplementary Figure 7.** Forest plot of the comparison of all-grade diarrhea between the Apatinib+S-1 and S-1 groups. S-1: Gimeracil and Oteracil Porassium Capsules. The fixed-effects meta-analysis model (Mantel–Haenszel method) was used.

**Supplementary Figure 8.** Forest plot of the comparison of all-grade thrombocytopenia between the Apatinib+S-1 and S-1 groups. S-1: Gimeracil and Oteracil Porassium Capsules. The fixed-effects meta-analysis model (Mantel–Haenszel method) was used.

**Supplementary Figure 9.** Forest plot of the comparison of all-grade oral mucositis between the Apatinib+S-1 and S-1 groups. S-1: Gimeracil and Oteracil Porassium Capsules. The fixed-effects meta-analysis model (Mantel–Haenszel method) was used.

**Supplementary Figure 10.** Forest plot of the comparison of all-grade weak between the Apatinib+S-1 and S-1 groups. S-1: Gimeracil and Oteracil Porassium Capsules. The fixed-effects meta-analysis model (Mantel–Haenszel method) was used.

**Supplementary Figure 11.** Forest plot of the comparison of all-grade leucopenia between the Apatinib+S-1 and S-1 groups. S-1: Gimeracil and Oteracil Porassium Capsules. The fixed-effects meta-analysis model (Mantel–Haenszel method) was used.

**Supplementary Figure 12.** Forest plot of the comparison of all-grade neutropenia between the Apatinib+S-1 and S-1 groups. S-1: Gimeracil and Oteracil Porassium Capsules. The fixed-effects meta-analysis model (Mantel–Haenszel method) was used.

**Supplementary Figure 13.** Funnel plot of percentage of complete response rates (CR, A), partial response rates (PR, B) stable disease rates (SD, C) and progressive disease rates (PD, D).

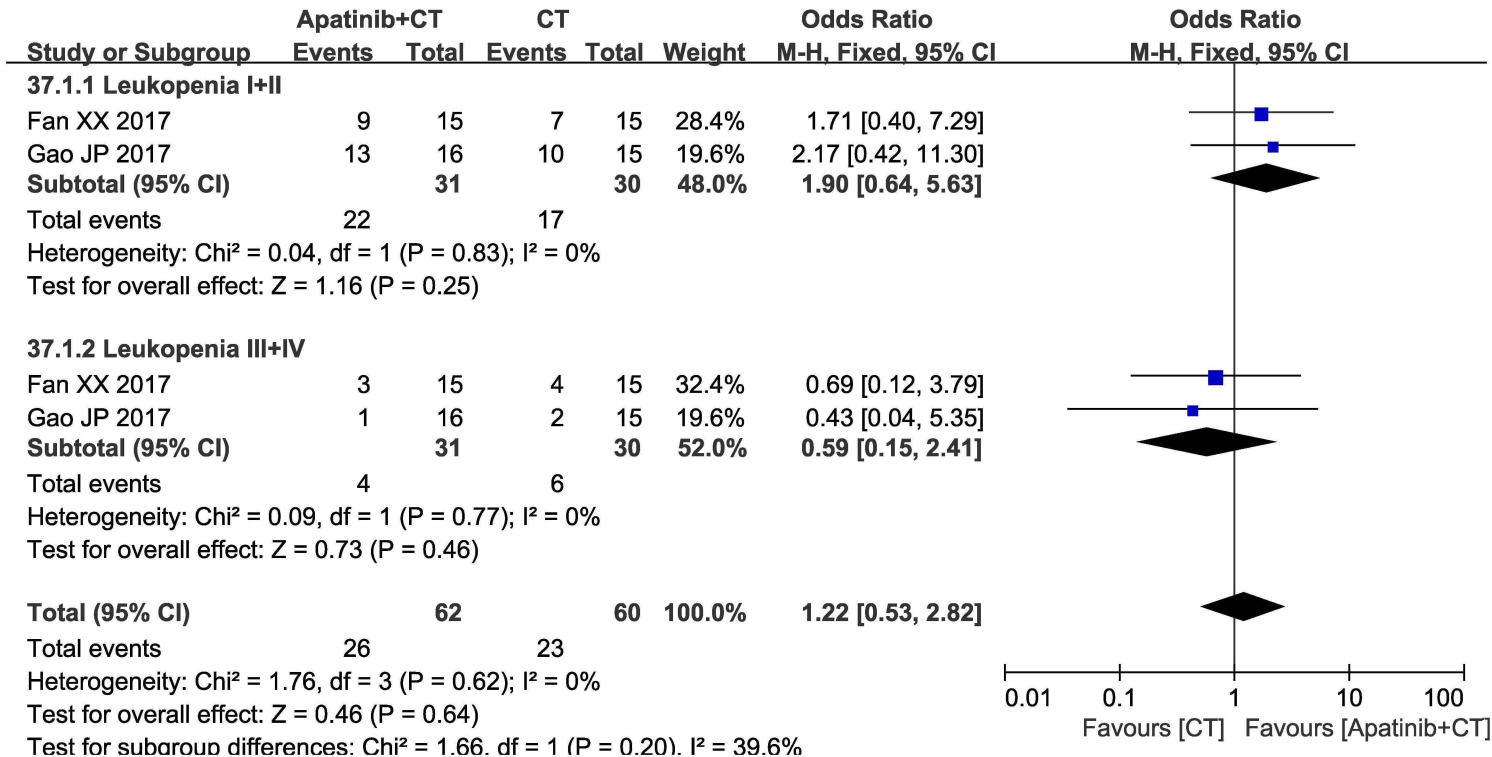

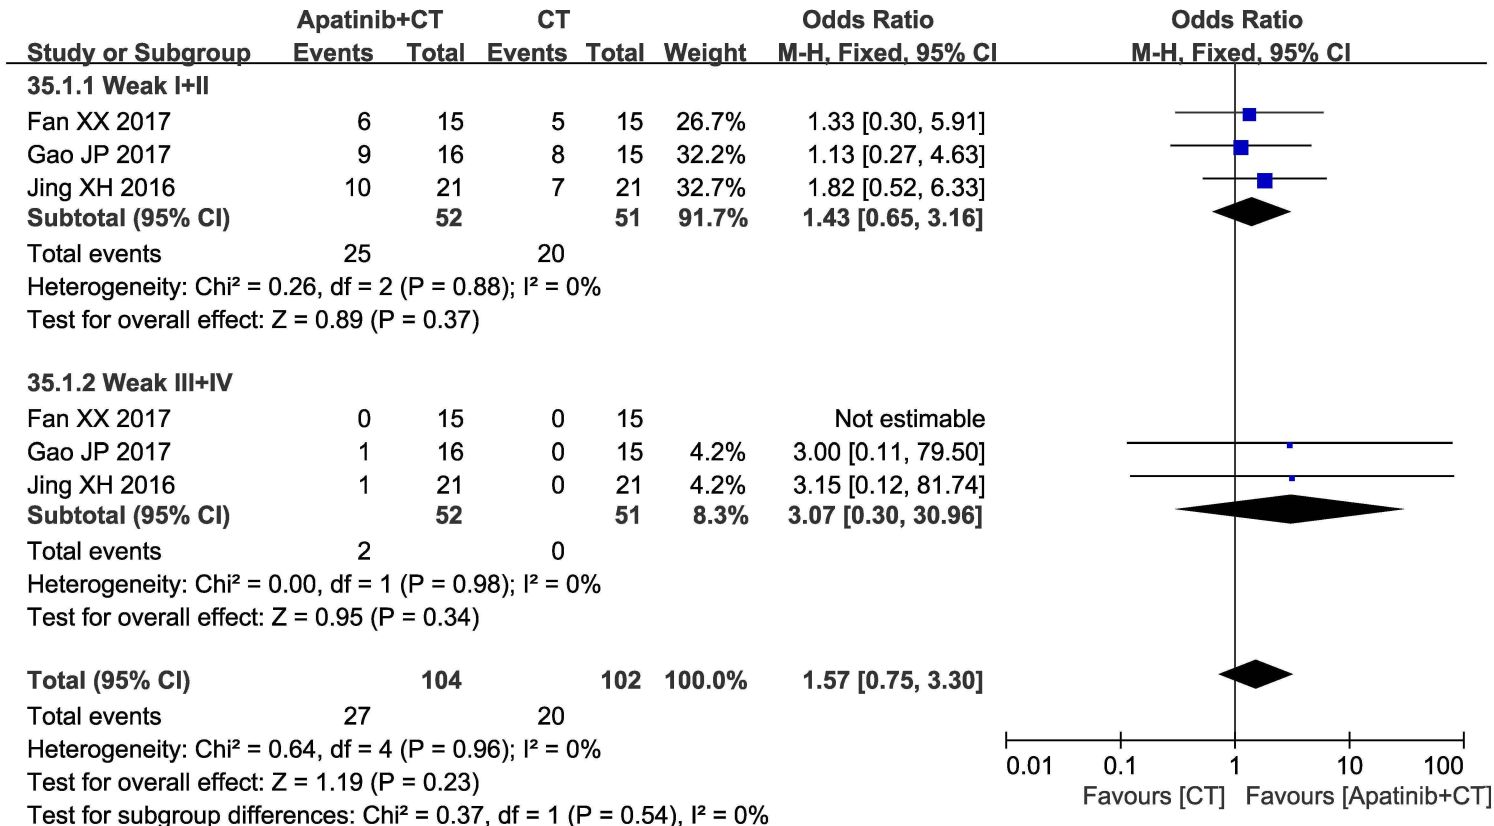

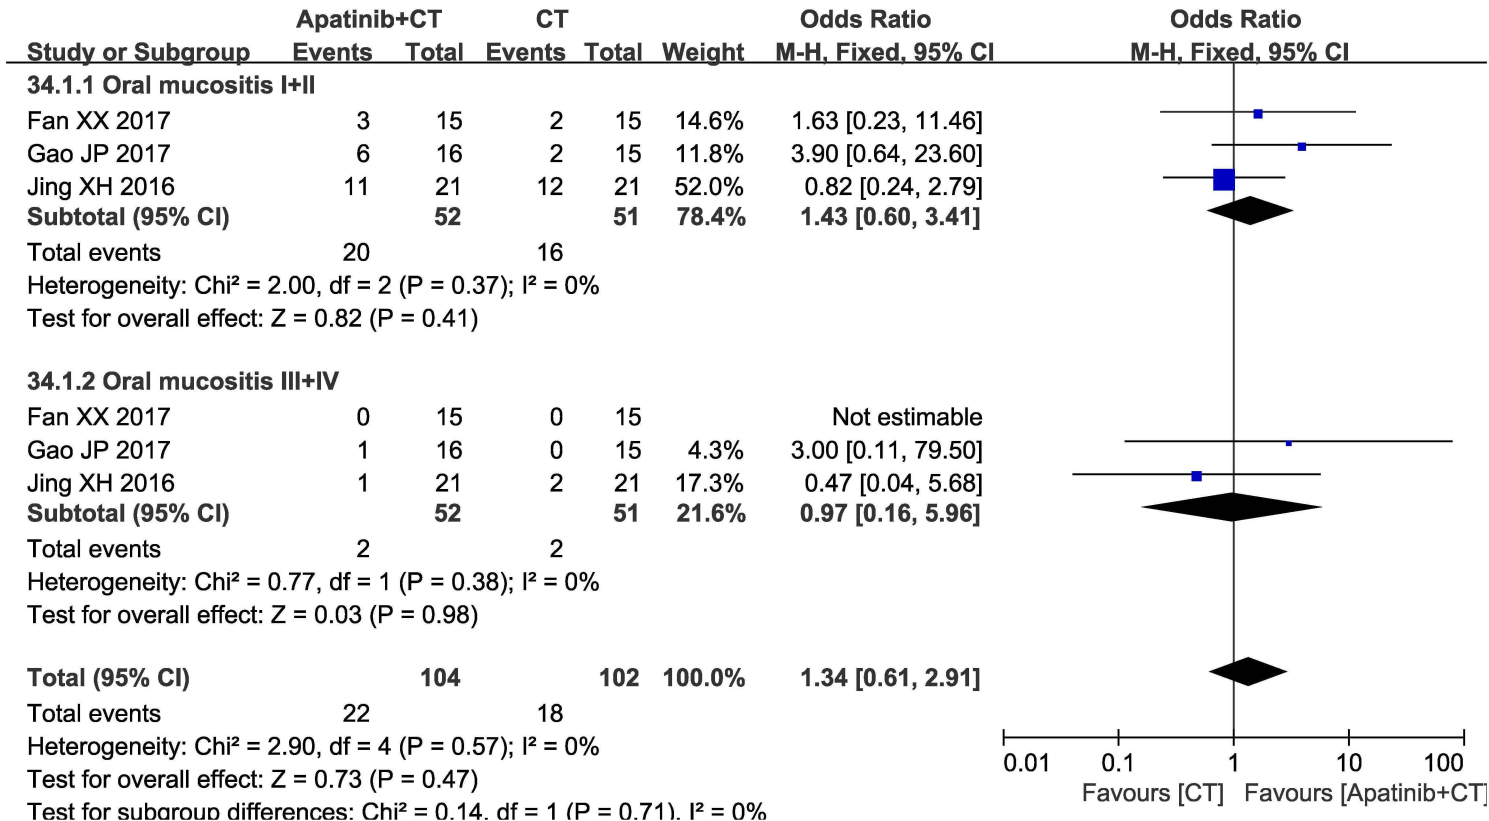

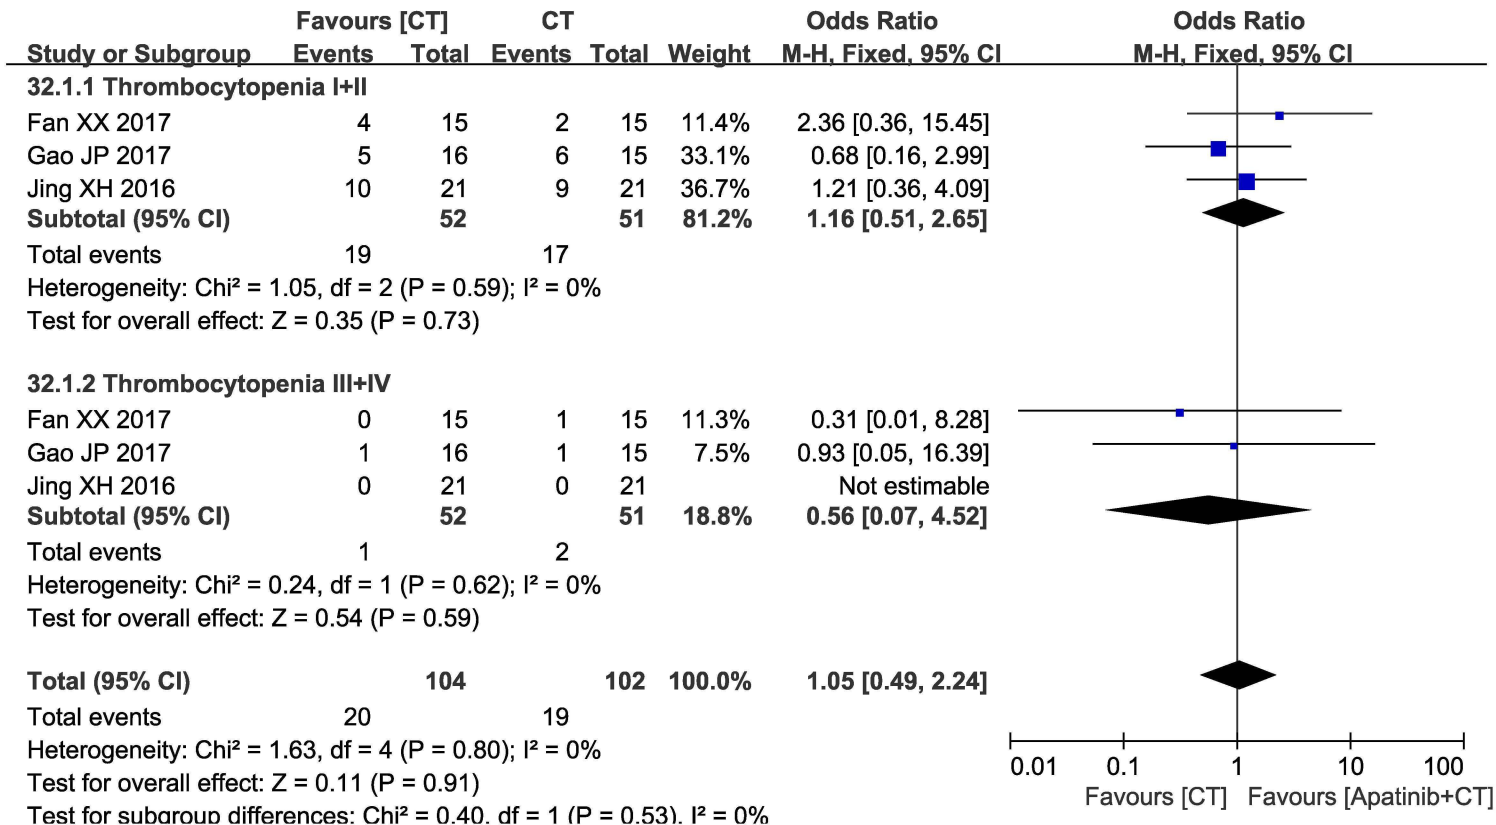

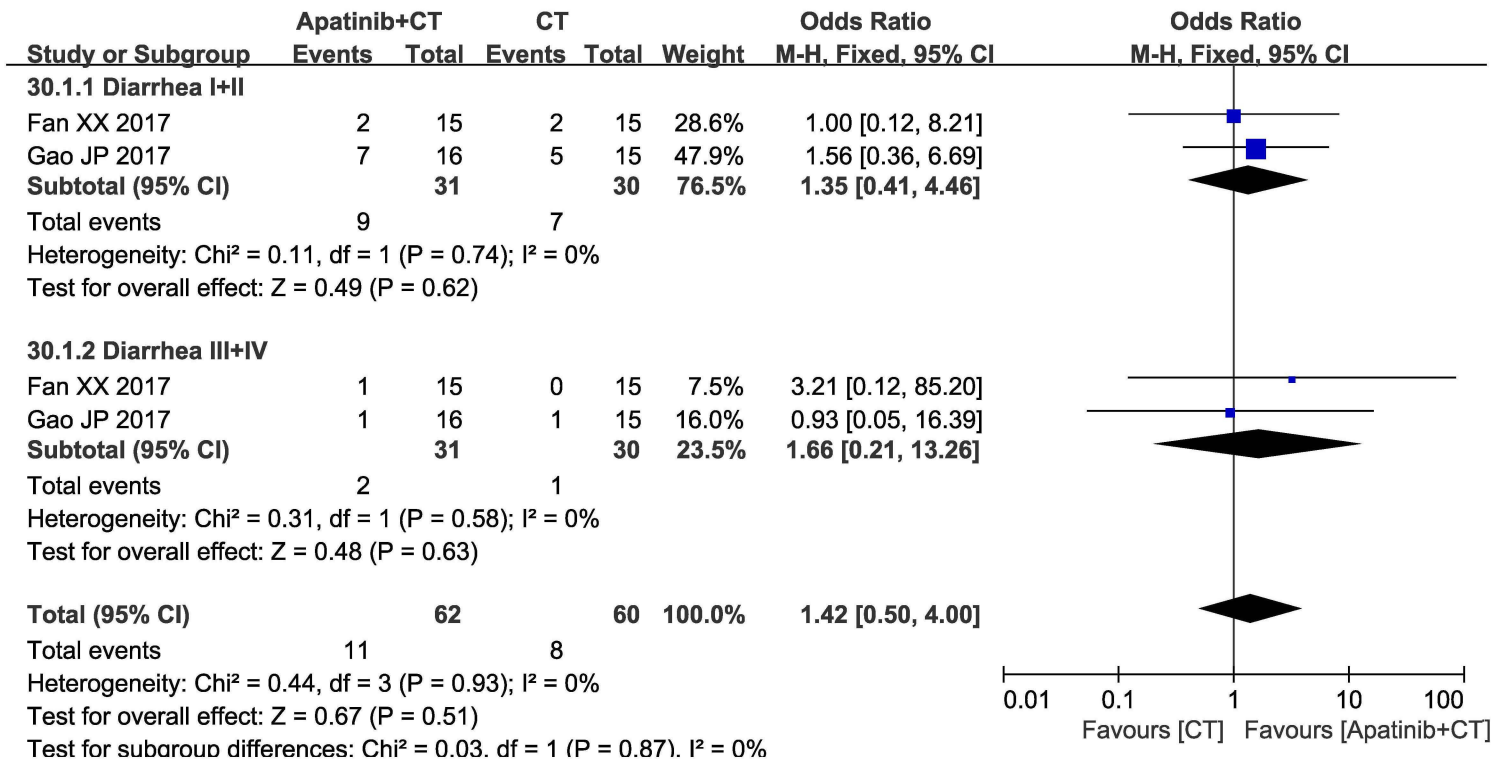

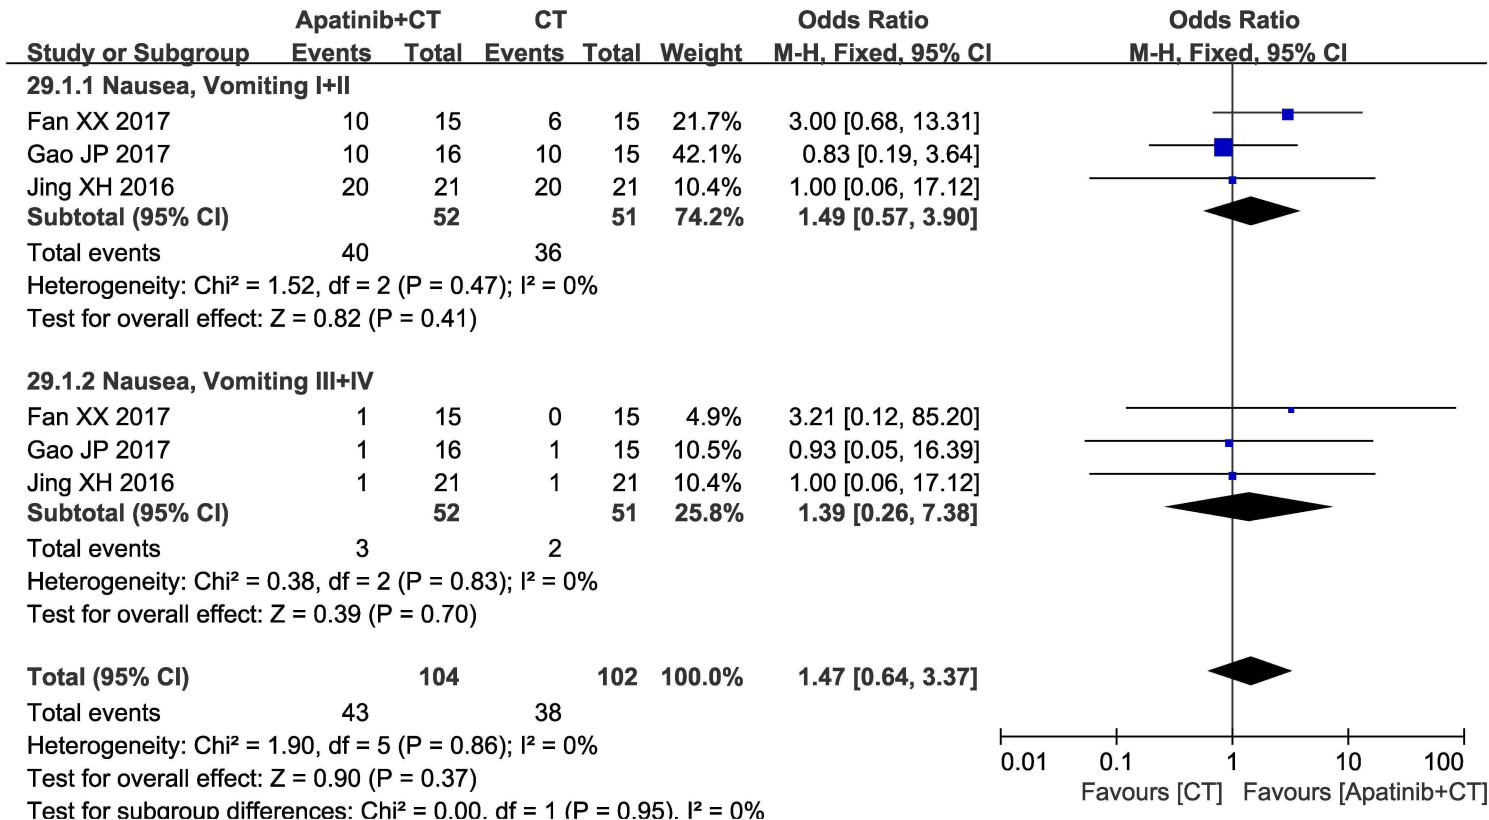



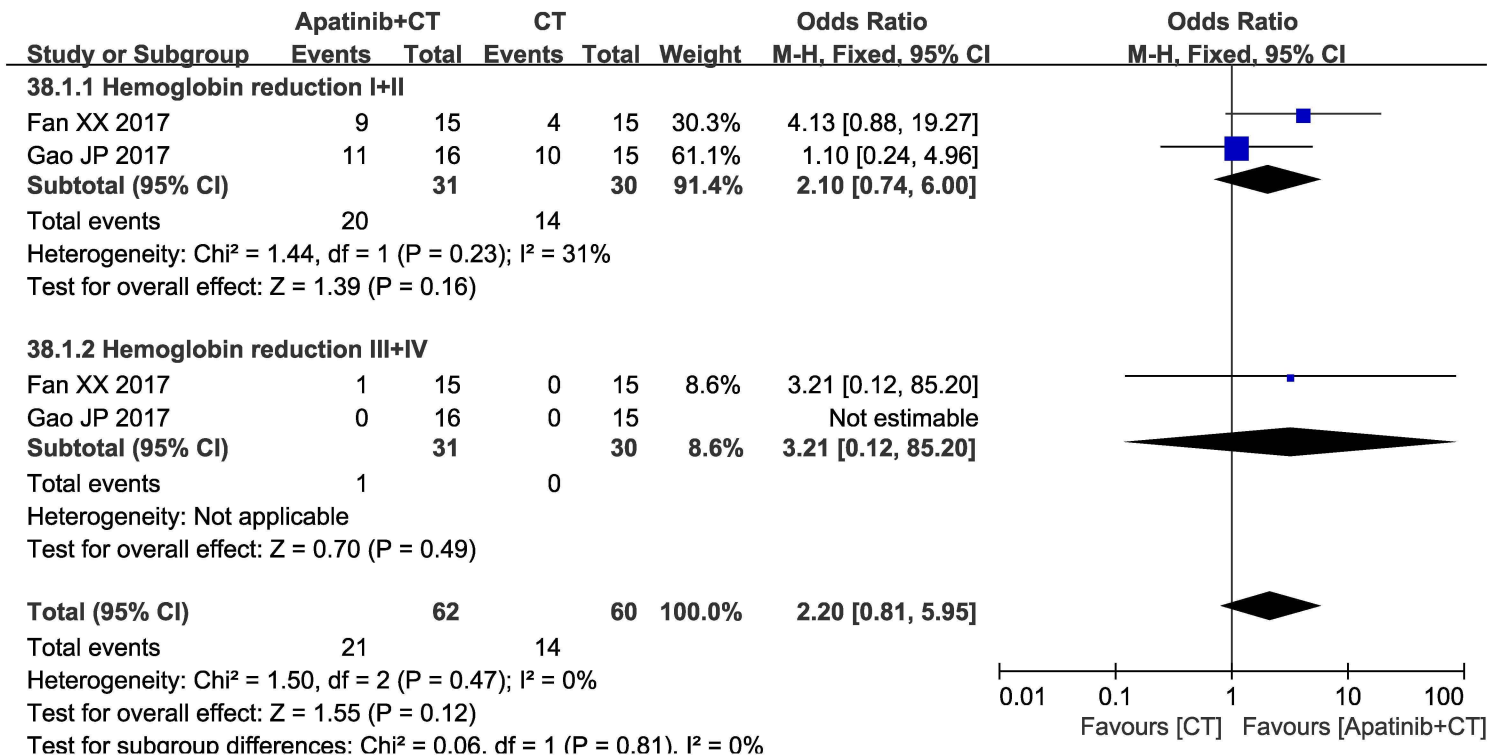

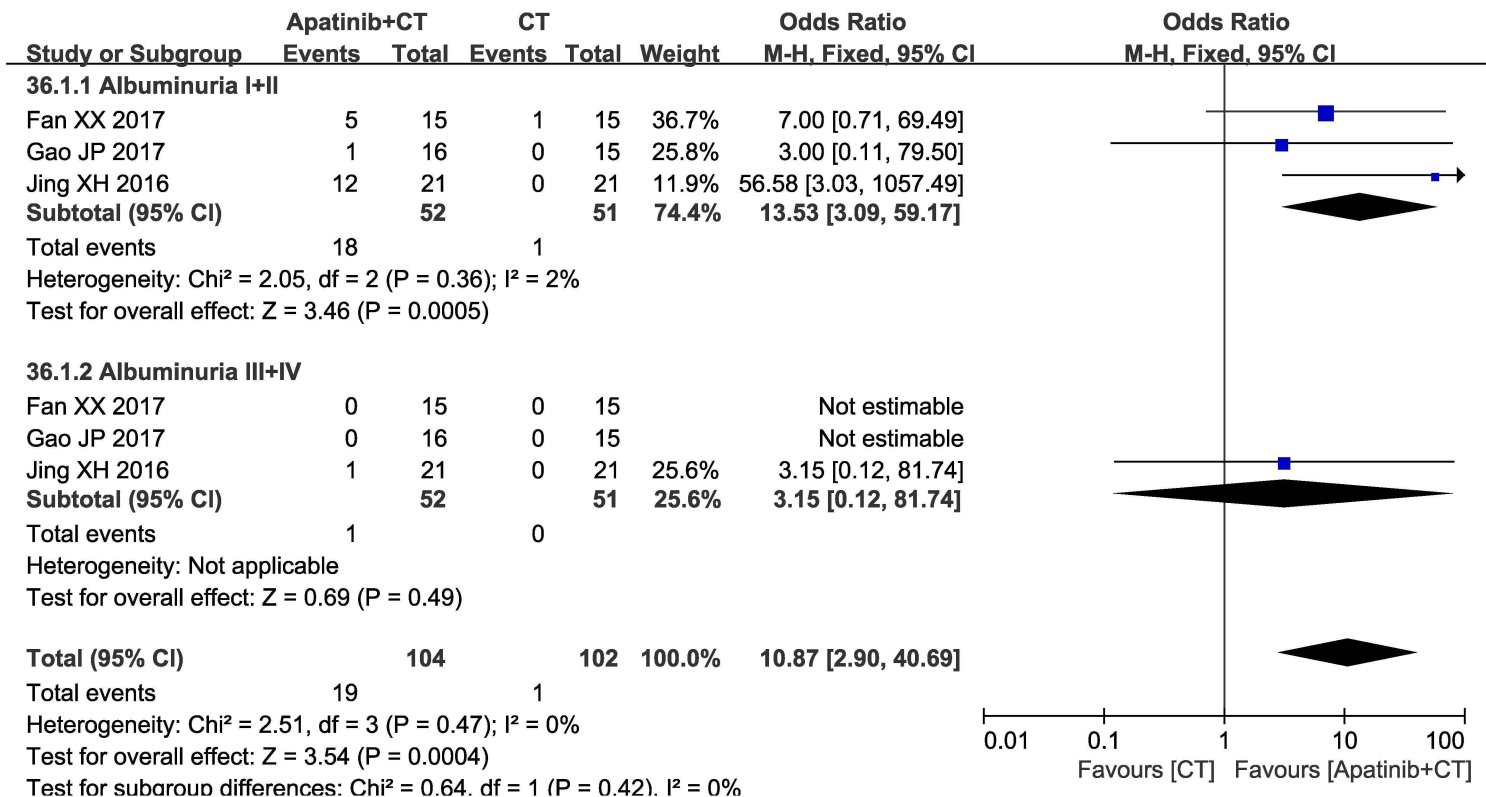

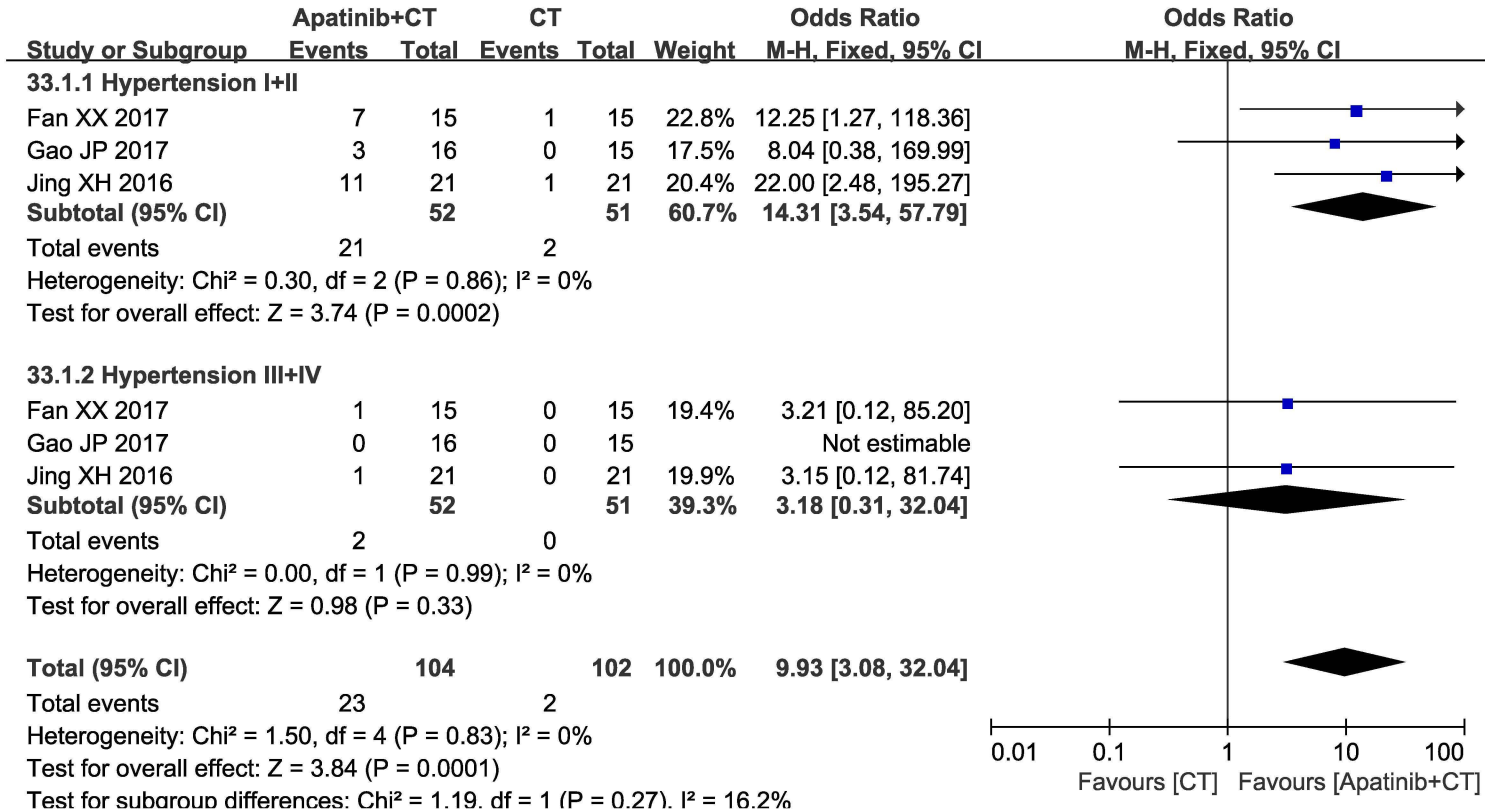

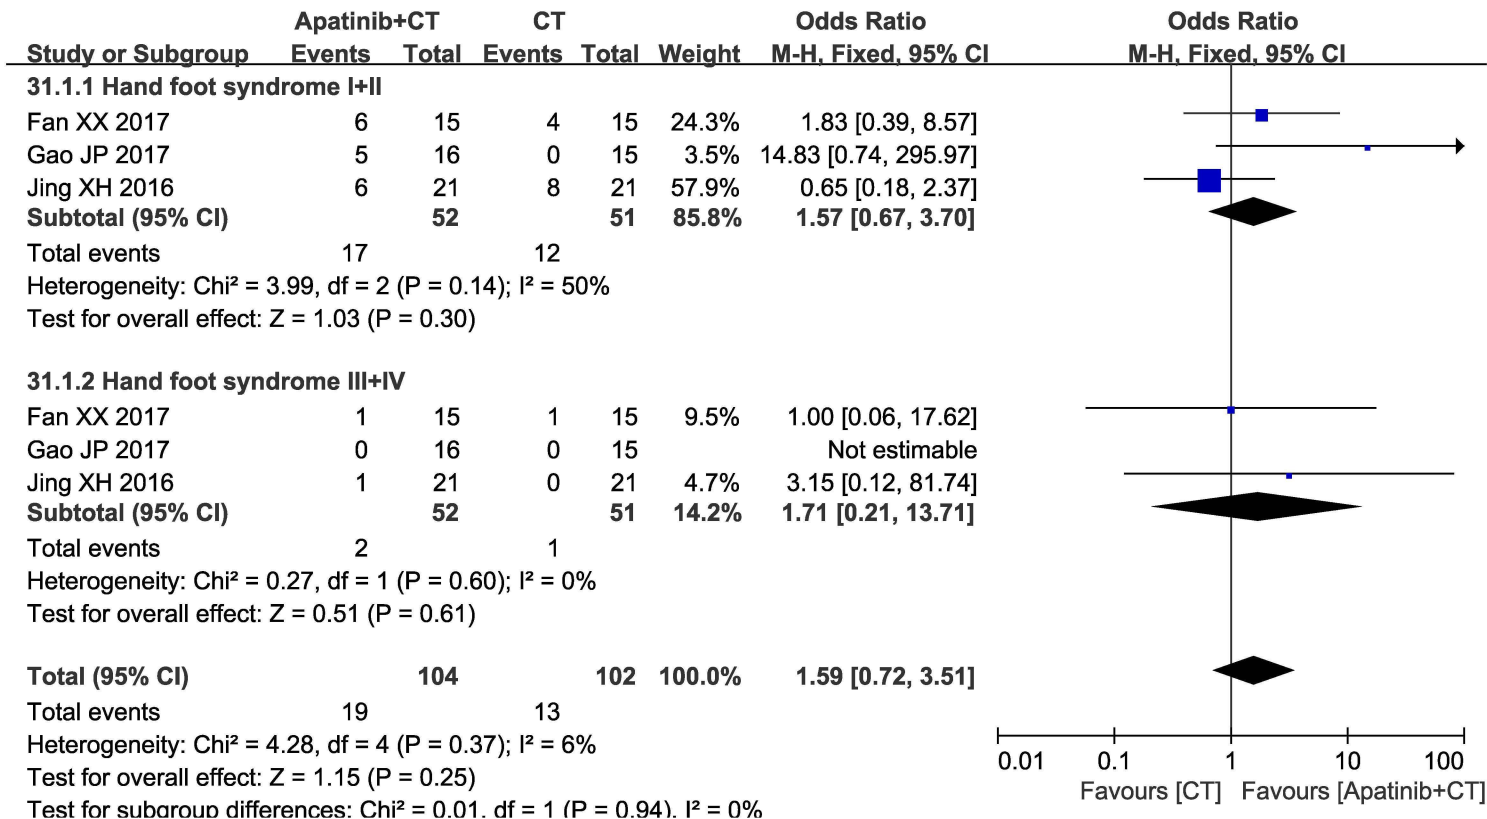

# A

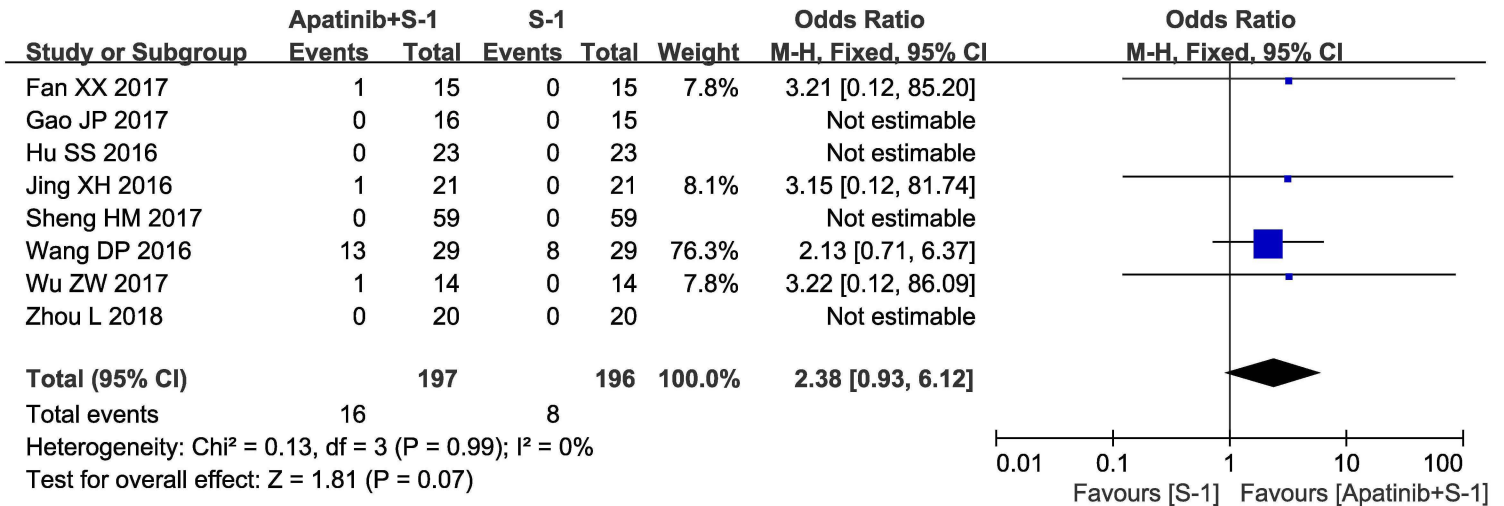

# B

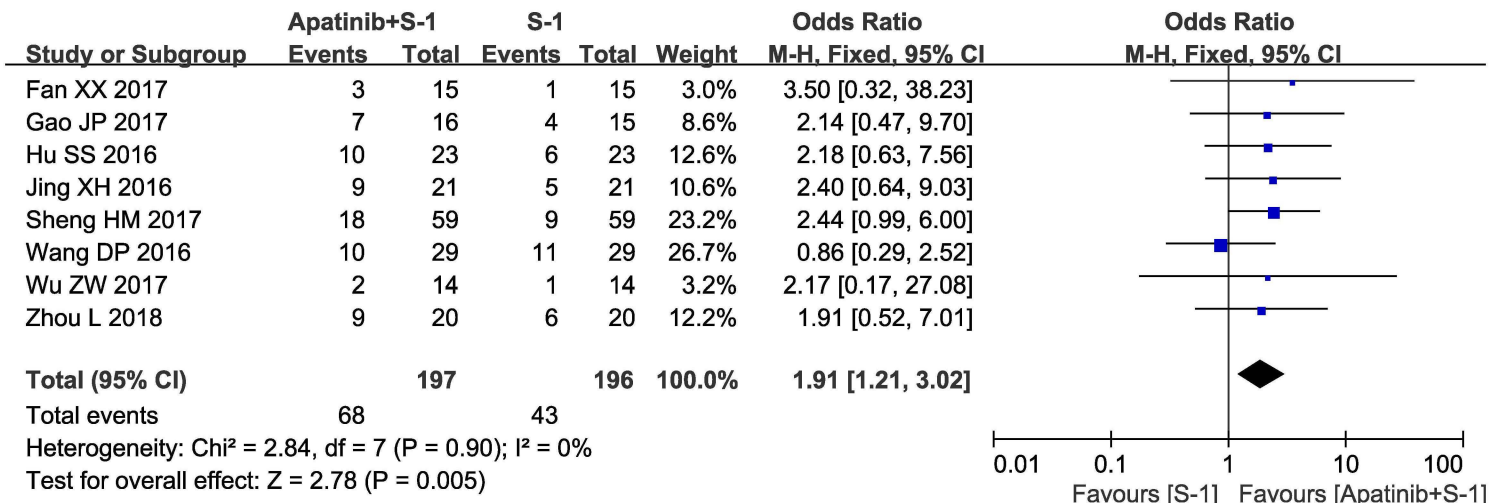

# C

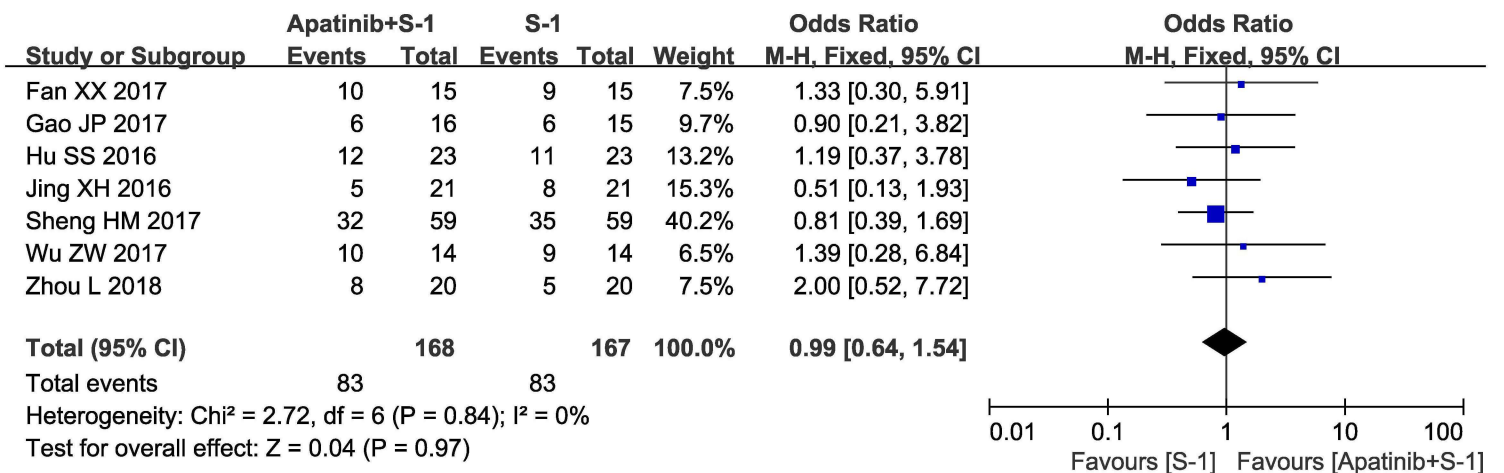

# D

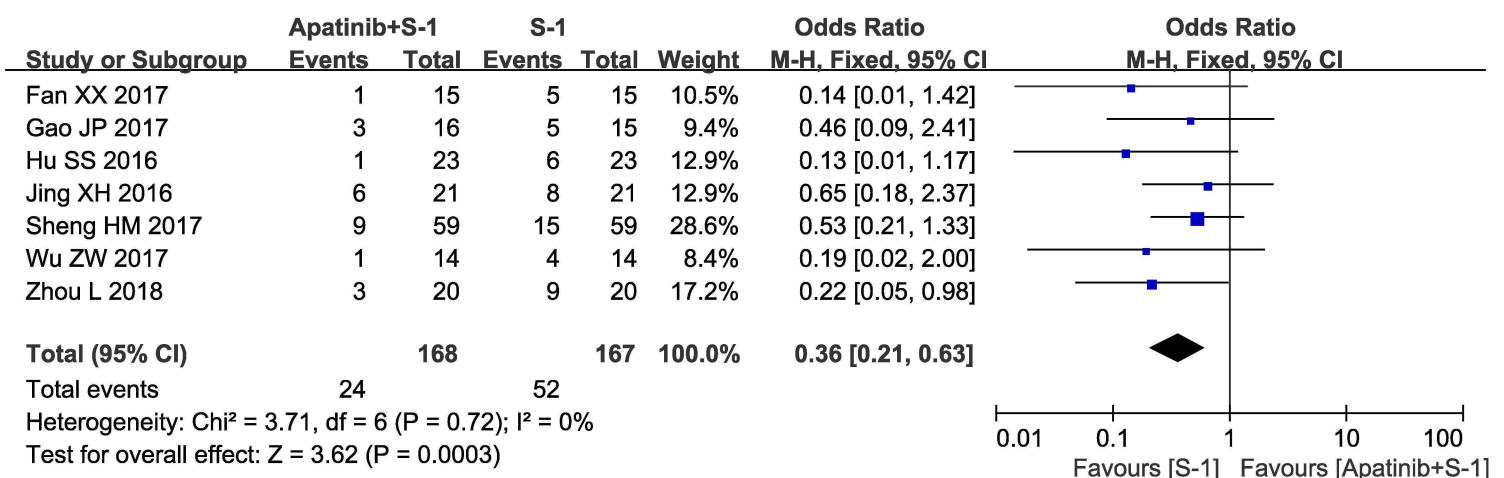

**A**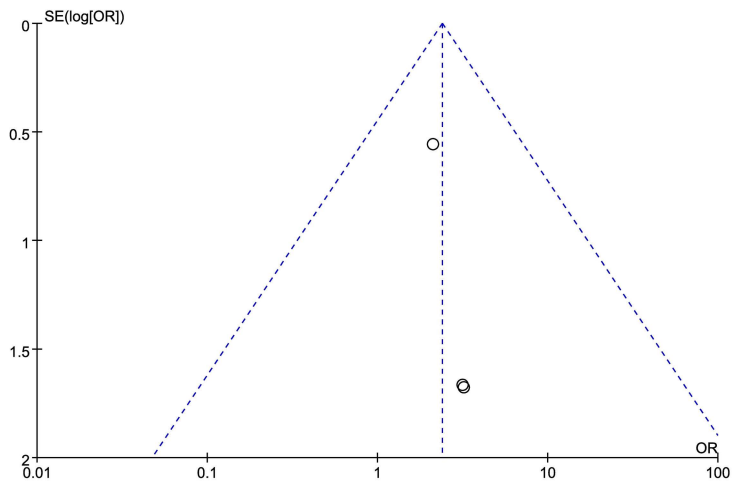**B**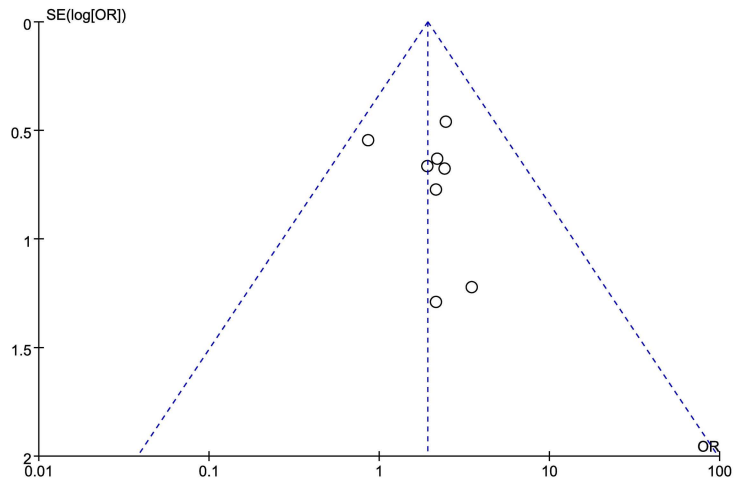**C**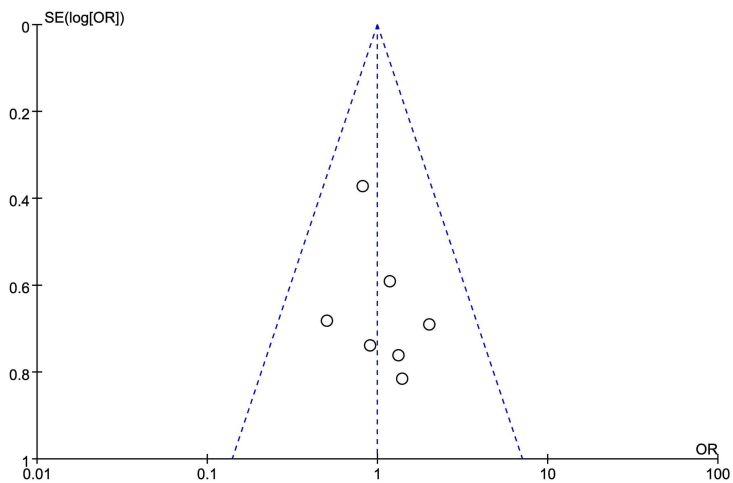**D**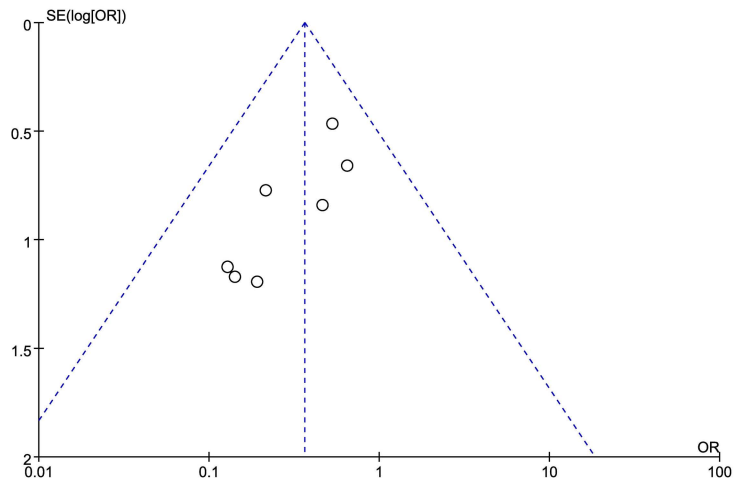

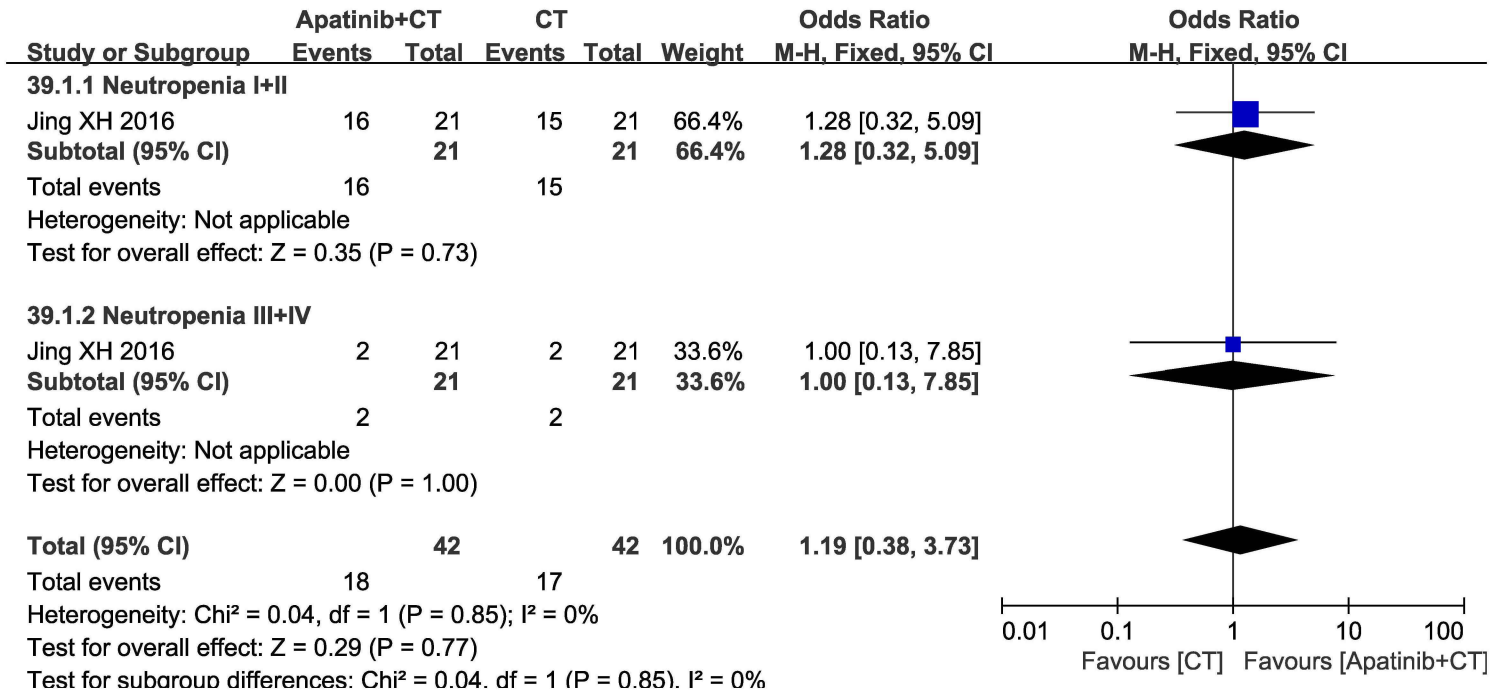

**Supplementary Table 1.** Clinical information from the eligible trials in the meta-analysis.

| Included studies | Blinding methods | Tumor stage | Gender (F/M) |              | Number of metastatic sites (No.) | Follow-up time | IT or RR | Other treatments before S-1/Apatinib+S-1 |
|------------------|------------------|-------------|--------------|--------------|----------------------------------|----------------|----------|------------------------------------------|
|                  |                  |             | S-1          | Apatinib+S-1 |                                  |                |          |                                          |
| Fan XX           | ND               | III-IV      | 11/4         | 12/3         | ≥1                               | ND             | Both     | ND                                       |
| Gao JP 2017      | ND               | Advanced    | ND           | ND           | ≥1                               | ND             | Both     | ND                                       |
| Hu SS 2016       | double-blinded   | Advanced    | 18/5         | 19/4         | ≥1                               | ND             | ND       | ND                                       |
| Jing XH          | ND               | Advanced    | 13/8         | 12/9         | ≥1, ≥2(18)                       | ND             | Both     | ND                                       |
| Sheng HM         | ND               | III-IV      | 41/18        | 38/21        | ND                               | ND             | RR       | ND                                       |
| Wang DP          | ND               | Advanced    | 13/16        | 15/14        | ND                               | ND             | ND       | ND                                       |
| Wu ZW            | ND               | III-IV      | 10/4         | 12/2         | ≥1                               | ND             | RR       | FOLFOX, DCF, XELOX                       |
| Zhou L 2018      | ND               | IV          | 11/9         | 13/7         | ≥1                               | ND             | RR       | ND                                       |

**Abbreviations:** ND: No description; S-1: Gimeracil and Oteracil Potassium Capsules; IT: initial treatment; RR: refractory relapsed; FOLFOX: Oxaliplatin+Calcium folinate+5-Fluorouracil; XELOX: Oxaliplatin+Capecitabine; DCF: Cisplatin+5-fluorouracil +docetaxel.
